# Supplementary material
Source: PubMed Central journal article supplement (PMC6649808)
Supplement: pky079_supp.pdf [file pky079_supp.pdf]

## *Supplementary Materials*

### **Tumor variant identification that accounts for the unique molecular landscape of pediatric malignancies**

#### **Supplemental Methods**

**Tumour samples.** All tumour samples were retrospectively sourced from the Biobank at BC Children's Hospital (BCCH) following approval by the University of British Columbia Children's and Women's Research Ethics Board (REB #H17-01860).

**Amplicon-based sequencing and variant determination.** Extraction of DNA (RecoverAll, Thermo Fisher Scientific (TFS)) and RNA (Allprep, Qiagen), library preparation, and targeted sequencing on the Ion Chef and Ion Torrent S5 platforms followed manufacturer's protocols (TFS). OncoPrint Comprehensive Assay version 3 (OCAV3) includes 2,290 unique DNA-based amplicons to detect SNVs and CNVs as well as 867 RNA-based amplicons to detect unique fusions or structural variants. OncoPrint Childhood Cancer Research Assay (OCCRA) includes 2,031 unique DNA-based and 1,701 RNA-based amplicons. Detection sensitivities include: hotspot mutations (OCAV3: 99.2%; OCCRA: 99%), Indels (OCAV3: 96.9%; OCCRA: 100%), and fusions (OCAV3: 95.4%; OCCRA: 92.2% or 82.9% for blood or tissue samples) [1, 2]. Average read depth for DNA and RNA for both panels was approximately  $9 \times 10^6$ - $12 \times 10^6$  and  $8 \times 10^5$  -  $1 \times 10^6$ , respectively.

SNVs, including those in pediatric cancer driver genes, non-driver genes, variants of undetermined significance and benign/likely benign variants, were retrieved with Ion Reporter software (version 5.2). Copy number (CN) measurements were retrieved with Ion Reporter software (version 5.2) for genes with >5 probes, including those that were validated for CN gains (Table S5). We noted frequent detection of homogenous loss for CDKN2A, which is not validated in either panel. To determine cut-offs for CN loss and CN gain that were verifiable by orthogonal clinical reports and/or whole genome sequencing, CN measurements for 14 genes captured by both panels were plotted and true positive calls for CN gains or losses were marked (Figure S2). A cut-off for loss at  $CN < 1.1$  and a cut-off for gain at  $CN > 3.5$  gave 35 abnormal CN calls in these 14 genes; 19 of those calls (7 gains, 12 losses) were verifiable by clinical reports and/or whole genome sequencing. For these 19 true positive calls, the OCCRA panel detected 18 of 19 (95%)(one false negative: sample 27 gave PDGFRA at  $CN=3$ ) while OCAV3 panel detected 16 of 19 (80%)(three false negatives: sample 13 gave CDKN2A at  $CN > 1.1$ ; sample 16 gave MYCN at  $CN > 1.1$ ; sample 23 gave CDKN2AB at  $CN > 1.1$ )(Figure S2).

Archived and summarized whole genome sequencing data from the analysis of matched samples, when available, was provided by the Personalized Onco-Genomics program [3].

**Data winnowing for pediatric cancer driver genes.** Variants that were detected and filtered out of the analysis are tabulated in Table S2. These variants were filtered out when: (1) the variation occurred in genes not

considered to be driver genes for pediatric tumors (indicated by a \*, Table S2); (2) the variant is of undetermined significance (indicated by a ‡, Table S2); or, (3) the variant is benign/likely benign (indicated by a ^, Table S2).

**Variant – agent determination.** Variant-agent pairs were determined using the Pediatric MATCH prioritization strategy [4]. Variant- agent pairs supported by clinical trials or case reports, including JAK1 variants with JAK/STAT inhibitors [5] and NUP214-ABL1 with tyrosine kinase inhibitors [6, 7], were also included.

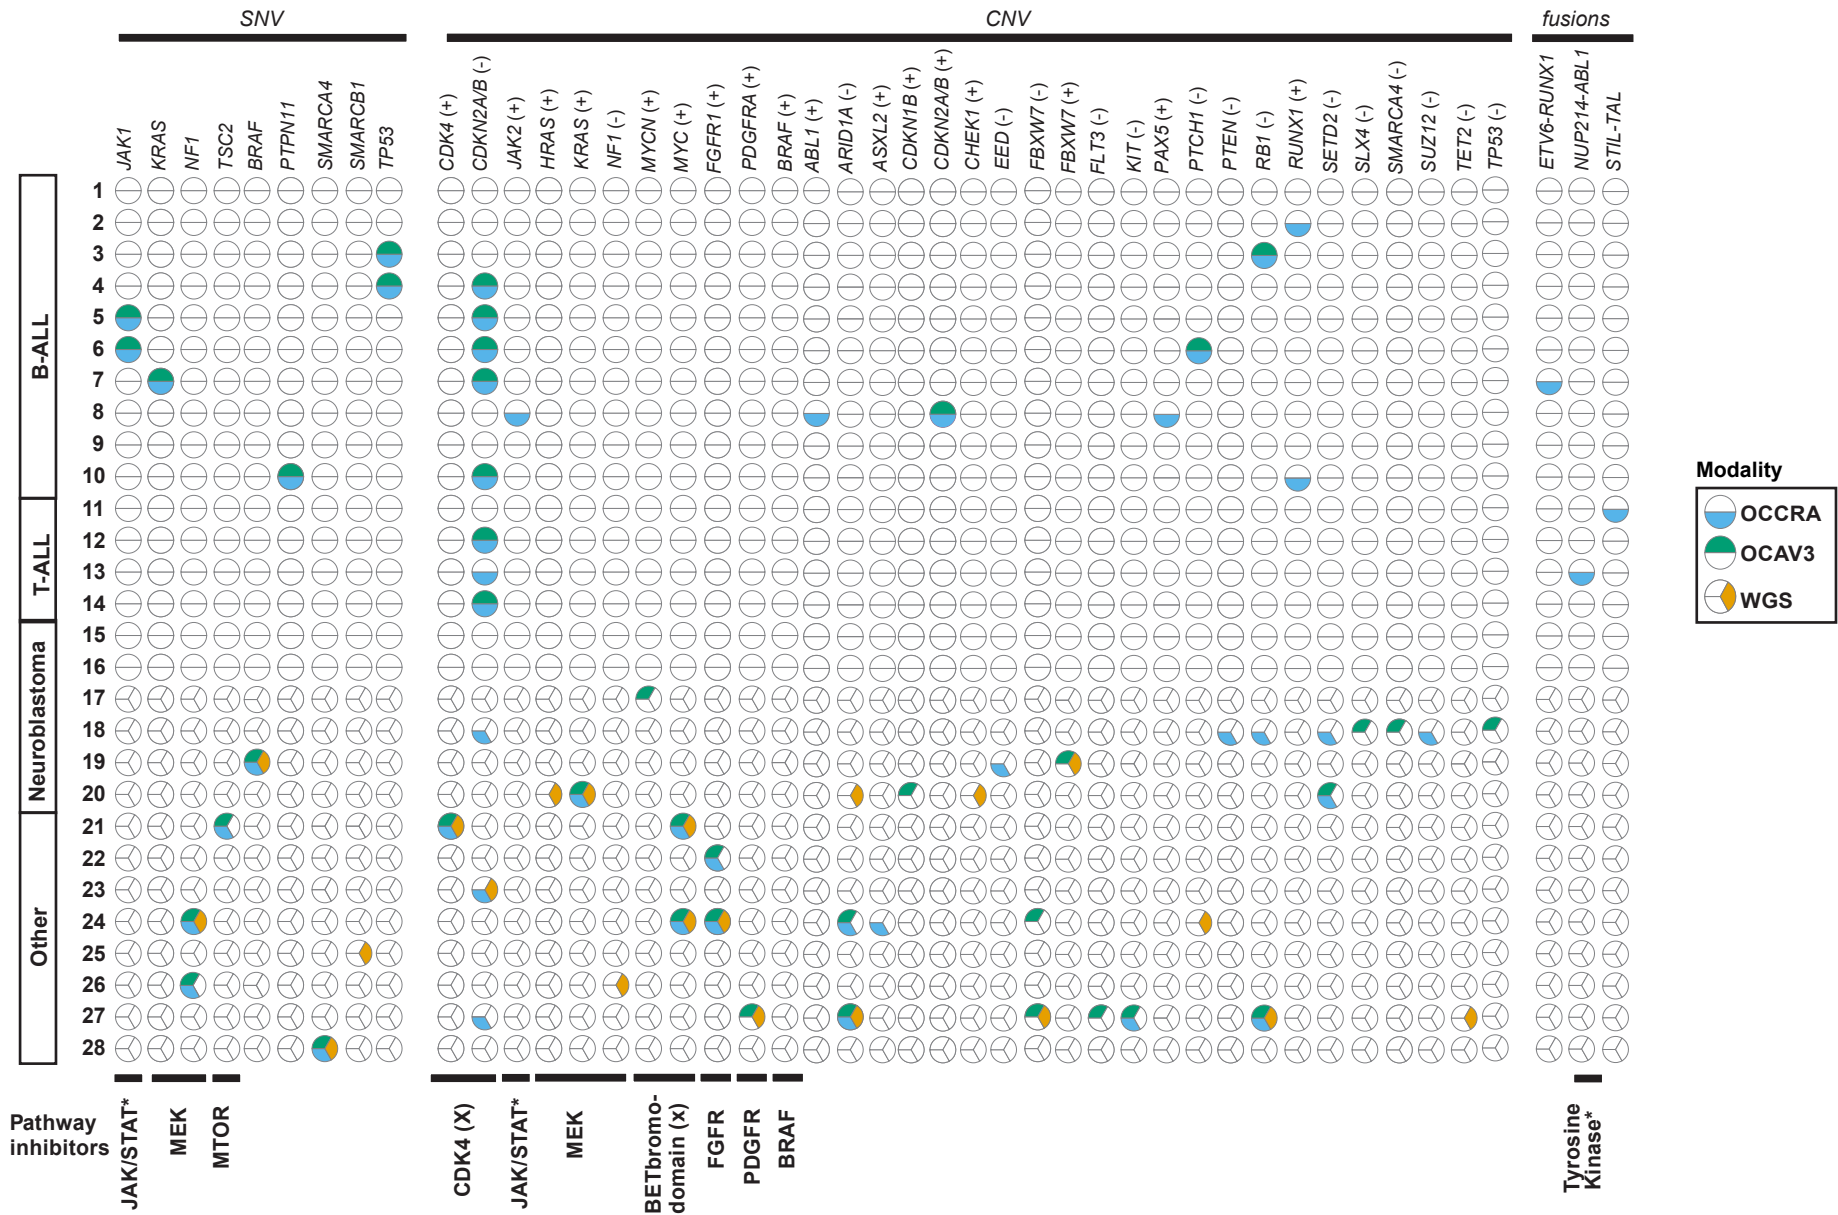

**Figure S1. Comparison between whole genome or amplicon-based sequencing detection of pediatric cancer driver genes.**

Single nucleotide variants (SNV), copy number variants (CNV) and fusions were assayed across 28 samples using amplicon-based sequencing and, for the final 12 samples, whole genome sequencing (WGS). The detection of a variant is indicated by a filled half- or semi-circle with the color corresponding to the modality that detected the variant. Using the strategy outlined by the Pediatric MATCH target-agent prioritization committee, target - inhibitor pairs were determined for each sample. Inhibitors to those pathways that were reviewed by the committee but are not currently included in Pediatric MATCH are designated with an (X). Agents that were not included for review by Pediatric MATCH are indicated by an asterisk.

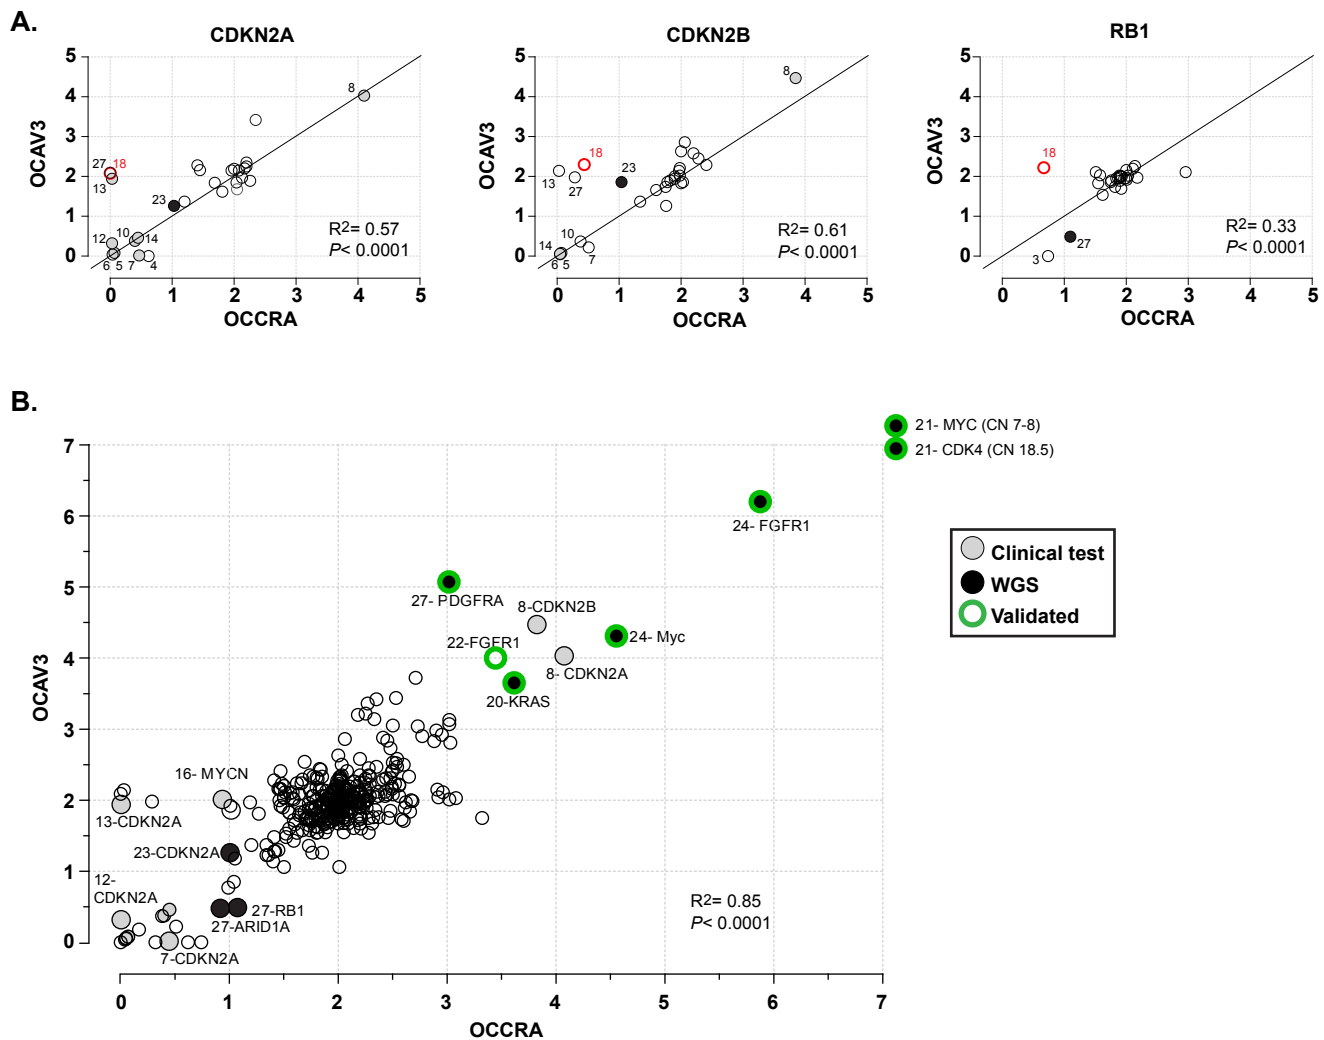

**Figure S2. Congruent detection of copy number variation by amplicon-based sequencing.**

A. Copy number measurements for indicated genes across 28 samples. Sample #18 (red), which had low tumor content (<20%), gave discordant measurements. Selected gene-sample measurements are highlighted as follows: gains/ losses that were also observed by whole genome sequencing (WGS) are indicated by black circles; gains/ losses that were annotated in clinical reports are indicated by grey circles.

B. Copy number measurements for those genes that are common between OCCRA and OCAV3 and contained >5 probes across 27 samples (n=378 measurements per panel). Data obtained from sample #18 is excluded. Selected gene-sample measurements are highlighted as follows: gene probes that were validated for amplification are circled in green; gains/ losses that were also observed by whole genome sequencing (WGS) are indicated by black circles; gains/ losses that were annotated in clinical reports are indicated by grey circles.

## Supplemental Tables

**Table S1:** SNVs, CNVs, and fusions, filtered for pediatric cancer driver genes, are tabulated for amplicon-based (OCCRA or OCAV3) and whole genome sequencing (WGS). Clinical data was extracted for samples 1 – 16. Not available, N/A.

| Sample | Patient         | Cancer Type   | Tumor content |        | SNVs (allele frequency)  |                          |     | CNVs (copy number)                                                                       |                                                     |     | Fusions (counts)           |       |
|--------|-----------------|---------------|---------------|--------|--------------------------|--------------------------|-----|------------------------------------------------------------------------------------------|-----------------------------------------------------|-----|----------------------------|-------|
|        |                 |               | WGS           | Panels | OCCRA                    | OCAv3                    | WGS | OCCRA                                                                                    | OCAv3                                               | WGS | OCCRA                      | OCAv3 |
| 1      | 1               | B-ALL         | -             | 96     | 0                        | 0                        | -   | 0                                                                                        | 0                                                   | -   | 0                          | 0     |
| 2      | 2               | B-ALL         | -             | 79     | 0                        | 0                        | -   | RUNX1 (4.35)                                                                             | 0                                                   | -   | 0                          | 0     |
| 3      | 3-<br>Diagnosis | B-ALL         | -             | 83     | TP53 (0.82)<br>Arg248Gln | TP53 (0.79)<br>Arg248Gln | -   | RB1 (0.74) ^                                                                             | RB1 (0) ^                                           | -   | 0                          | 0     |
| 4      | 3-<br>Relapse2  | B-ALL         | -             | 67     | TP53 (0.80)<br>Arg248Gln | TP53 (0.82)<br>Arg248Gln | -   | CDKN2A (0.62) ^                                                                          | CDKN2A (0) ^                                        | -   | 0                          | 0     |
| 5      | 4-<br>Relapse2  | B-ALL         | -             | 96     | JAK1 (0.48)<br>Val658Phe | JAK1 (0.46)<br>Val658Phe | -   | CDKN2A (0.07) ‡, ^<br>CDKN2B (0.07) ^                                                    | CDKN2A (0.08) ‡, ^<br>CDKN2B (0.08) ^               | -   | 0                          | 0     |
| 6      | 4-<br>Relapse5  | B-ALL         | -             | 90     | JAK1 (0.98)<br>Val658Phe | JAK1 (0.98)<br>Val658Phe | -   | CDKN2A (0.04) ^<br>CDKN2B (0.04) ^<br>PTCH1 (1.0) ^                                      | CDKN2A (0.05) ^<br>CDKN2B (0.05) ^<br>PTCH1 (0.9) ^ | -   | 0                          | 0     |
| 7      | 5               | B-ALL         | -             | 92     | KRAS (0.16)<br>Gly12Ser  | KRAS (0.19)<br>Gly12Ser  | -   | CDKN2A(0.47) ‡, ^<br>CDKN2B (0.51) ^                                                     | CDKN2A(0.17) ‡, ^<br>CDKN2B (0.22) ^                | -   | ETV6-<br>RUNX1<br>(922510) | 0     |
| 8      | 6-<br>Relapse1  | B-ALL         | -             | N/A    | 0                        | 0                        | -   | JAK2 (4.00) ‡<br>CDKN2A(4.10) ‡, ^<br>CDKN2B (3.9) ‡, ^<br>PAX5(4.00) ‡<br>ABL1 ‡ (3.54) | CDKN2A(4.03) ‡, ^<br>CDKN2B (4.47) ‡, ^             | -   | 0                          | 0     |
| 9      | 7               | B-ALL         | -             | 97     | 0                        | 0                        | -   | 0                                                                                        | 0                                                   | -   | 0                          | 0     |
| 10     | 8               | B-ALL         | -             | 90     | PTPN11(0.37)<br>Glu76Lys | PTPN11(0.38)<br>Glu76Lys | -   | CDKN2A(0.40) ‡, ^<br>CDKN2B (0.38) ^<br>RUNX1 (3.71)                                     | CDKN2A(0.38) ‡, ^<br>CDKN2B (0.37) ^                | -   | 0                          | 0     |
| 11     | 9               | T-ALL         | -             | 90     | 0                        | 0                        | -   | 0                                                                                        | 0                                                   | -   | STIL-TAL<br>(5678)         | 0     |
| 12     | 10              | T-ALL         | -             | 81     | 0                        | 0                        | -   | CDKN2A(0.03) ‡, ^                                                                        | CDKN2A(0.32) ‡, ^                                   | -   | 0                          | 0     |
| 13     | 11              | T-ALL         | -             | 96     | 0                        | 0                        | -   | CDKN2A ‡ (0.03)<br>CDKN2B (0.03)                                                         | 0                                                   | -   | NUP214-<br>ABL1<br>(12524) | 0     |
| 14     | 12              | T-ALL         | -             | 83     | 0                        | 0                        | -   | CDKN2A ‡, ^ (0.45)<br>CDKN2B ‡, ^ (0.05)                                                 | CDKN2A ‡, ^ (0.46)<br>CDKN2B ‡, ^ (0.06)            | -   | 0                          | 0     |
| 15     | 13              | Neuroblastoma | -             | N/A    | 0                        | 0                        | -   | 0                                                                                        | 0                                                   | -   | 0                          | 0     |
| 16     | 14              | Neuroblastoma | -             | N/A    | 0                        | 0                        | -   | 0                                                                                        | 0                                                   | -   | 0                          | 0     |
| 17     | 15              | Neuroblastoma | 80%           | N/A    | 0                        | 0                        | 0   | 0                                                                                        | MYCN ‡ (3.7)                                        | 0   | 0                          | 0     |
| 18     | 16              | Neuroblastoma | 41%           | 23%    | 0                        | 0                        | 0   | CDKN2A (0)<br>CDKN2B (0.44)<br>PTEN (0.53)<br>RB1 (0.67)<br>SETD2 (0.67)<br>SUZ12 (0.53) | SLX4 (0.84)<br>TP53(0.53)<br>SMARCA4 (1.07)         | 0   | 0                          | 0     |

|    |             |                   |     |     |                                    |                                    |                               |                                                                                                                                                    |                                                                                                                                                                                                       |                                                                                                                                                                    |   |   |
|----|-------------|-------------------|-----|-----|------------------------------------|------------------------------------|-------------------------------|----------------------------------------------------------------------------------------------------------------------------------------------------|-------------------------------------------------------------------------------------------------------------------------------------------------------------------------------------------------------|--------------------------------------------------------------------------------------------------------------------------------------------------------------------|---|---|
| 19 | 17-Relapse5 | Neuroblastoma     | 90% | 58% | <b>BRAF</b> (0.54)<br>Gly469Ala    | <b>BRAF</b> (0.56)<br>Gly469Ala    | <b>BRAF</b><br>Gly469Ala      | <b>EED</b> (0.45)                                                                                                                                  | <b>FBXW7</b> <sup>^</sup> (3.5)                                                                                                                                                                       | <b>FBXW7</b> <sup>^</sup> (gain)                                                                                                                                   | 0 | 0 |
| 20 | 18-Relapse1 | Neuroblastoma     | 45% | 43% | 0                                  | 0                                  | 0                             | <b>SETD2</b> <sup>^</sup> (0.33)<br><b>KRAS</b> <sup>†^</sup> (3.7)                                                                                | <b>SETD2</b> <sup>^</sup> (0)<br><b>CDKN1B</b> (3.57)<br><b>KRAS</b> <sup>†^</sup> (3.7)                                                                                                              | <b>CHEK1</b> (Gain)<br><b>KRAS</b> (Gain)<br><b>HRAS</b> (Gain)<br><b>ARID1A</b> (Loss)                                                                            | 0 | 0 |
| 21 | 19          | Osteosarcoma      | 78% | 95% | <b>TSC2</b> (0.63)<br>Tyr190Ter    | <b>TSC2</b> (0.67)<br>Tyr190Ter    | 0                             | <b>CDK4</b> <sup>†^</sup> (15.3)<br><b>MYC</b> <sup>†^</sup> (7.16)                                                                                | <b>CDK4</b> <sup>†^</sup> (18.68)<br><b>MYC</b> <sup>†^</sup> (8.27)                                                                                                                                  | <b>CDK4</b> <sup>†^</sup><br><b>MYC</b> <sup>†^</sup>                                                                                                              | 0 | 0 |
| 22 | 20          | Astrocytoma       | 41% | 80% | 0                                  | 0                                  | 0                             | <b>FGFR1</b> <sup>†^</sup> (3.5)                                                                                                                   | <b>FGFR1</b> <sup>†^</sup> (4.0)                                                                                                                                                                      | 0                                                                                                                                                                  | 0 | 0 |
| 23 | 21          | Glioblastoma      | 58% | 20% | 0                                  | 0                                  | 0                             | <b>CDKN2A</b> <sup>^</sup> (1.0)<br><b>CDKN2B</b> <sup>^</sup> (1.0)                                                                               | 0                                                                                                                                                                                                     | <b>CDKN2A</b> (loss) <sup>^</sup><br><b>CDKN2B</b> (loss) <sup>^</sup>                                                                                             | 0 | 0 |
| 24 | 22-Relapse1 | Rhabdomyosarcoma  | 98% | 70% | <b>NF1</b> (0.44)<br>Glu318fs      | <b>NF1</b> (0.44)<br>Glu318fs      | <b>NF1</b><br>Glu318Lysfs     | <b>ARID1A</b> <sup>^</sup> (0.17)<br><b>FGFR1</b> <sup>†^</sup> (5.91)<br><b>MYC</b> <sup>^</sup> (4.59)<br><b>ASXL2</b> (3.65)                    | <b>ARID1A</b> <sup>^</sup> (0.19)<br><b>FBXW7</b> (0.33)<br><b>FGFR1</b> <sup>†^</sup> (6.29)<br><b>MYC</b> <sup>3</sup> (4.31)                                                                       | <b>FGFR1</b> <sup>†^</sup> (Gain)<br><b>MYC</b> <sup>^</sup> (Gain)<br><b>PTCH1</b> (Loss)                                                                         | 0 | 0 |
| 25 | 23          | Rhabdoid (kidney) | 23% | 43% | 0                                  | 0                                  | <b>SMARCB1</b><br>Glu300Aspfs | 0                                                                                                                                                  | 0                                                                                                                                                                                                     | 0                                                                                                                                                                  | 0 | 0 |
| 26 | 24-Relapse1 | Neurofibroma      | 35% | 60% | <b>NF1</b> (0.59)<br>Arg2637Ter    | <b>NF1</b> (0.55)<br>Arg2637Ter    | 0                             | 0                                                                                                                                                  | 0                                                                                                                                                                                                     | <b>NF1</b> (loss)                                                                                                                                                  | 0 | 0 |
| 27 | 25          | Glioblastoma      | 88% | 63% | 0                                  | 0                                  | 0                             | <b>ARID1A</b> <sup>^</sup> (0.95)<br><b>CDKN2A</b> (0)<br><b>CDKN2B</b> (0.29)<br><b>KIT</b> <sup>^</sup> (0.99)<br><b>RB1</b> <sup>^</sup> (1.10) | <b>ARID1A</b> <sup>^</sup> (0.48)<br><b>FBXW7</b> <sup>^</sup> (0.64)<br><b>FLT3</b> (0.88)<br><b>KIT</b> <sup>^</sup> (0.77)<br><b>PDGFRA</b> <sup>†^</sup> (5.07)<br><b>RB1</b> <sup>^</sup> (0.50) | <b>ARID1A</b> <sup>^</sup> (loss)<br><b>FBXW7</b> <sup>^</sup> (loss)<br><b>PDGFRA</b> <sup>^</sup> (gain)<br><b>RB1</b> <sup>^</sup> (loss)<br><b>TET2</b> (loss) | 0 | 0 |
| 28 | 26          | Rhabdoid (kidney) | 76% | 65% | <b>SMARCA4</b> (0.38)<br>Gln144Ter | <b>SMARCA4</b> (0.39)<br>Gln144Ter | <b>SMARCA4</b><br>Gln144Ter   | 0                                                                                                                                                  | 0                                                                                                                                                                                                     | 0                                                                                                                                                                  | 0 | 0 |

\* variants detected with probes validated for CNV

† variants confirmed by clinical tests

^ variants detected by >1 modality

**Table S2:** Summary of filtered out SNVs, CNVs, and fusions for amplicon-based (OCCRA or OCAV3) and whole genome sequencing (WGS). Not available, N/A.

| Sample | Patient         | Cancer Type   | Tumor content |        | SNVs (allele frequency)                |                                         |                                                                     | CNVs (copy number)                                   |                                                                                                                  |                                                                                                                                                                                                         | Fusions (counts) |       |
|--------|-----------------|---------------|---------------|--------|----------------------------------------|-----------------------------------------|---------------------------------------------------------------------|------------------------------------------------------|------------------------------------------------------------------------------------------------------------------|---------------------------------------------------------------------------------------------------------------------------------------------------------------------------------------------------------|------------------|-------|
|        |                 |               | WGS           | Panels | OCCRA                                  | OCAv3                                   | WGS                                                                 | OCCRA                                                | OCAv3                                                                                                            | WGS                                                                                                                                                                                                     | OCCRA            | OCAv3 |
| 1      | 1               | B-ALL         | -             | 96     | 0                                      | ATM <sup>^</sup> (0.48)<br>Asp1853Asn   | N/A                                                                 | 0                                                    | 0                                                                                                                | -                                                                                                                                                                                                       | 0                | 0     |
| 2      | 2               | B-ALL         | -             | 79     | 0                                      | ATM <sup>^</sup> (0.49)<br>Asp1853Asn   | N/A                                                                 | 0                                                    | 0                                                                                                                | -                                                                                                                                                                                                       | 0                | 0     |
| 3      | 3-<br>Diagnosis | B-ALL         | -             | 83     | 0                                      | 0                                       | N/A                                                                 | 0                                                    | 0                                                                                                                | -                                                                                                                                                                                                       | 0                | 0     |
| 4      | 3-<br>Relapse2  | B-ALL         | -             | 67     | 0                                      | 0                                       | N/A                                                                 | 0                                                    | 0                                                                                                                | -                                                                                                                                                                                                       | 0                | 0     |
| 5      | 4-<br>Relapse2  | B-ALL         | -             | 96     | 0                                      | SETD2 <sup>‡</sup> (0.49)<br>Tyr1481Ter | N/A                                                                 | 0                                                    | 0                                                                                                                | -                                                                                                                                                                                                       | 0                | 0     |
| 6      | 4-<br>Relapse5  | B-ALL         | -             | 90     | 0                                      | SETD2 <sup>‡</sup> (0.53)<br>Tyr1481Ter | N/A                                                                 | 0                                                    | 0                                                                                                                | -                                                                                                                                                                                                       | 0                | 0     |
| 7      | 5               | B-ALL         | -             | 92     | 0                                      | 0                                       | N/A                                                                 | 0                                                    | 0                                                                                                                | -                                                                                                                                                                                                       | 0                | 0     |
| 8      | 6-<br>Relapse1  | B-ALL         | -             | N/A    | 0                                      | 0                                       | N/A                                                                 | 0                                                    | 0                                                                                                                | -                                                                                                                                                                                                       | 0                | 0     |
| 9      | 7               | B-ALL         | -             | 97     | 0                                      | 0                                       | N/A                                                                 | 0                                                    | 0                                                                                                                | -                                                                                                                                                                                                       | 0                | 0     |
| 10     | 8               | B-ALL         | -             | 90     | 0                                      | ATM <sup>^</sup> (0.46)<br>Asp1853Asn   | N/A                                                                 | 0                                                    | 0                                                                                                                | -                                                                                                                                                                                                       | 0                | 0     |
| 11     | 9               | T-ALL         | -             | 90     | 0                                      | 0                                       | N/A                                                                 | 0                                                    | 0                                                                                                                | -                                                                                                                                                                                                       | 0                | 0     |
| 12     | 10              | T-ALL         | -             | 81     | FBXW7 <sup>^</sup> (0.04)<br>Arg465His | FBXW7 <sup>^</sup> (0.04)<br>Arg465His  | N/A                                                                 | 0                                                    | 0                                                                                                                | -                                                                                                                                                                                                       | 0                | 0     |
| 13     | 11              | T-ALL         | -             | 96     | 0                                      | SLX4 <sup>‡</sup> (0.53)<br>Gln1632fs   | N/A                                                                 | CRLF1 <sup>+</sup> (0.93)                            | 0                                                                                                                | -                                                                                                                                                                                                       | 0                | 0     |
| 14     | 12              | T-ALL         | -             | 83     | 0                                      | 0                                       | N/A                                                                 | 0                                                    | 0                                                                                                                | -                                                                                                                                                                                                       | 0                | 0     |
| 15     | 13              | Neuroblastoma | -             | N/A    | 0                                      | 0                                       | N/A                                                                 | 0                                                    | 0                                                                                                                | -                                                                                                                                                                                                       | 0                | 0     |
| 16     | 14              | Neuroblastoma | -             | N/A    | 0                                      | KIT <sup>^</sup> (0.49)<br>Met541Leu    | N/A                                                                 | ABL2 <sup>+</sup> (4.01)<br>MYCN <sup>‡</sup> (0.96) | 0                                                                                                                | -                                                                                                                                                                                                       | 0                | 0     |
| 17     | 15              | Neuroblastoma | 80%           | N/A    | 0                                      | 0                                       | 0                                                                   | ERBB2 <sup>+</sup> (4.86)                            | CDK12 <sup>+</sup> (4.0)<br>ERBB2 <sup>+</sup> (4.32)<br>RNF43 <sup>+</sup> (4.14)<br>RAD51C <sup>+</sup> (4.04) | 0                                                                                                                                                                                                       | 0                | 0     |
| 18     | 16              | Neuroblastoma | 41%           | 23%    | 0                                      | SLX4 <sup>‡</sup> (0.53)<br>Gln1632fs   | 0                                                                   | KRAS <sup>‡</sup> (1.02)<br>MYCN <sup>‡</sup> (0.93) | 0                                                                                                                | 0                                                                                                                                                                                                       | 0                | 0     |
| 19     | 17-<br>Relapse5 | Neuroblastoma | 90%           | 58%    | 0                                      | ATM <sup>+</sup> (0.79)<br>Arg337His    | PIK3CA <sup>‡</sup><br>Gly12Asp<br>NOTCH1 <sup>‡</sup><br>Thr194Pro | CCND1 <sup>+</sup> (11.60)                           | CCND1 <sup>+</sup> (9.47)<br>FGF3 <sup>+</sup> (8.38)<br>FGF19 <sup>+</sup> (8.56)                               | CCND1 <sup>+</sup> (gain)<br>AURKA <sup>+</sup> (gain)<br>SMAD4 <sup>+</sup> (gain)<br>ERBB2 <sup>+</sup> (gain)<br>LRP1B <sup>+</sup> (gain)<br>CDK6 <sup>+</sup> (gain)<br>INPP4B <sup>+</sup> (gain) | 0                | 0     |
| 20     | 18-<br>Relapse1 | Neuroblastoma | 45%           | 43%    | 0                                      | MET <sup>+</sup> (0.51)<br>Glu168Asp    | ROS1 <sup>‡</sup><br>Ile1530Thr                                     | CCND1 <sup>+</sup> (7.76)                            | CCND1 <sup>+</sup> (6.47)<br>FGF3 <sup>+</sup> (6.02)                                                            | SFPQ <sup>+</sup> (loss)<br>MLH1 <sup>+</sup> (loss)<br>CLSPN <sup>+</sup> (loss)                                                                                                                       | 0                | 0     |

|    |             |                   |     |     |                                                 |                                              |                                                                                  |                                                                                                                                                                          |                                                                                                     |                                                                                                                                                                                                                                                                                                                                                                                           |   |   |
|----|-------------|-------------------|-----|-----|-------------------------------------------------|----------------------------------------------|----------------------------------------------------------------------------------|--------------------------------------------------------------------------------------------------------------------------------------------------------------------------|-----------------------------------------------------------------------------------------------------|-------------------------------------------------------------------------------------------------------------------------------------------------------------------------------------------------------------------------------------------------------------------------------------------------------------------------------------------------------------------------------------------|---|---|
|    |             |                   |     |     |                                                 |                                              |                                                                                  |                                                                                                                                                                          |                                                                                                     | <b>XPC<sup>*</sup></b> (loss)<br><b>CUL5<sup>*</sup></b> (loss)<br><b>FANCD2<sup>*</sup></b> (loss)<br><b>ATM<sup>*</sup></b> (loss)<br><b>MUTYH<sup>*</sup></b> (loss)<br><b>CCND1/2</b> (gain)<br><b>FGF3/4<sup>*</sup></b> (gain)<br><b>ETV4<sup>*</sup></b> (gain)<br><b>GNAS<sup>*</sup></b> (gain)<br><b>NTRK1<sup>*</sup></b> (gain)<br><b>MDM4<sup>*</sup></b> (gain)             |   |   |
| 21 | 19          | Osteosarcoma      | 78% | 95% | 0                                               | 0                                            | 0                                                                                | <b>GLI1<sup>*</sup></b> (15.3)                                                                                                                                           | 0                                                                                                   | <b>CCNE1<sup>*</sup></b> (gain)<br><b>DMD<sup>*</sup></b> (loss)<br><b>LSAMP<sup>*</sup></b> (loss)                                                                                                                                                                                                                                                                                       | 0 | 0 |
| 22 | 20          | Astrocytoma       | 41% | 80% | 0                                               | 0                                            | 0                                                                                | <b>ABL2<sup>*</sup></b> (5.35)<br><b>FASLG<sup>*</sup></b> (5.29)<br><b>MDM4<sup>*</sup></b> (5.21)                                                                      | <b>DDR2<sup>*</sup></b> (5.39)<br><b>MDM4<sup>*</sup></b> (4.14)<br><b>NTRK1<sup>*</sup></b> (4.16) | <b>MCL1<sup>*</sup></b> (gain)<br><b>MDM4<sup>*</sup></b> (gain)                                                                                                                                                                                                                                                                                                                          | 0 | 0 |
| 23 | 21          | Glioblastoma      | 58% | 20% | 0                                               | 0                                            | 0                                                                                | 0                                                                                                                                                                        | 0                                                                                                   | 0                                                                                                                                                                                                                                                                                                                                                                                         | 0 | 0 |
| 24 | 22-Relapse1 | Rhabdomyosarcoma  | 98% | 70% | <b>PPM1D<sup>*</sup></b><br>(0.55)<br>Glu525Ter | 0                                            | <b>POLQ<sup>*</sup></b><br>Q2556Hfs                                              | <b>AKT1<sup>*</sup></b> (0.87)<br><b>ARID1B<sup>*</sup></b> (0.24)<br><b>CHD7<sup>*</sup></b> (5.71)<br><b>MTOR<sup>*</sup></b> (0.84)<br><b>KRAS<sup>‡</sup></b> (1.05) | <b>NBN<sup>*</sup></b> (5.47)<br><b>RAD51B<sup>*</sup></b> (0.86)<br><b>KRAS<sup>‡</sup></b> (0.9)  | 0                                                                                                                                                                                                                                                                                                                                                                                         | 0 | 0 |
| 25 | 23          | Rhabdoid (kidney) | 23% | 43% | 0                                               | 0                                            | <b>SMARCB1<sup>‡</sup></b><br>Glu300Aspfs                                        | 0                                                                                                                                                                        | 0                                                                                                   | 0                                                                                                                                                                                                                                                                                                                                                                                         | 0 | 0 |
| 26 | 24-Relapse1 | Neurofibroma      | 35% | 60% | 0                                               | 0                                            | <b>PRSS3<sup>*‡</sup></b><br>Arg255Gly<br><b>ACSM5<sup>*‡</sup></b><br>Asp400Asn | 0                                                                                                                                                                        | 0                                                                                                   | 0                                                                                                                                                                                                                                                                                                                                                                                         | 0 | 0 |
| 27 | 25          | Glioblastoma      | 88% | 63% | 0                                               | <b>PALB2<sup>*‡</sup></b> (0.43)<br>Arg170fs | 0                                                                                | 0                                                                                                                                                                        | 0                                                                                                   | <b>FUBP1<sup>*</sup></b> (loss)<br><b>FAT1<sup>*</sup></b> (loss)<br><b>SDHB<sup>*</sup></b> (loss)<br><b>CDKN2C<sup>*</sup></b> (loss)<br><b>ERCC5<sup>*</sup></b> (loss)<br><b>ING1<sup>*</sup></b> (loss)<br><b>NFKB1<sup>*</sup></b> (loss)<br><b>MUTYH<sup>*</sup></b> (loss)<br><b>BRCA2<sup>*</sup></b> (loss)<br><b>ATK3<sup>*</sup></b> (gain)<br><b>ABL2<sup>*</sup></b> (gain) | 0 | 0 |
| 28 | 26          | Rhabdoid (kidney) | 76% | 65% | <b>TET2<sup>*</sup></b> (0.45)<br>Val1718Leu    | 0                                            | 0                                                                                | 0                                                                                                                                                                        | 0                                                                                                   | 0                                                                                                                                                                                                                                                                                                                                                                                         | 0 | 0 |

\* variants in genes that are not frequently mutated in pediatric cancers

‡ variants of undetermined significance

^ benign/likely benign variants



**Table S3: 151 pediatric driver genes.** List derived from 77 significantly mutated genes [8] and the top 100 recurrently mutated genes in pediatric tumors [9] cross-referenced to remove duplicates.

|           |        |          |         |        |         |         |         |
|-----------|--------|----------|---------|--------|---------|---------|---------|
| AADA4     | CBFB   | EP300    | JAK2    | NIPBL  | PTPRD   | STAG2   | WDR64   |
| ABL1      | CBL    | ERG      | JAK3    | NKX2-1 | RAG1    | STAT5B  | WHSC1   |
| ACVR1     | CCND3  | ETV6     | KBTBD4  | NOCR1  | RB1     | SUFU    | WT1     |
| ADD3      | CDKN1B | FAT2     | KDM68   | NOTCH1 | RHOA    | SUZ12   | WZH2    |
| ALK       | CDKN2A | FBN2     | KDM6A   | NOTCH2 | ROS1    | TAL1    | XBP1    |
| ARID1A    | CDKN2B | FBXO11   | KIT     | NPM1   | RPL10   | TBL1RX1 | ZEB2    |
| ARID2     | CDK4   | FBXW7    | KMT2A   | NRAS   | RPL22   | TBR1    | ZFP36L2 |
| ASXL      | CEBPA  | FGFR1    | KMT2C   | NUP98  | RUNX1   | TCF3    | ZIC1    |
| ASXL2     | CHD4   | FLG      | KMT2D   | P2RY8  | SELP    | TCF7    | ZMYM3   |
| ATF7IP    | COL1A1 | FLT3     | KRAS    | PAX5   | SETD2   | TERT    | ZNF217  |
| ATRX      | CREBBP | FMR1     | LAPTM4B | PCBP1  | SF3B1   | TET2    | ZNF384  |
| BCL11B    | CRLF2  | GATA2    | LEF1    | PDGFRA | SH2B3   | TFAP4   |         |
| BCOR      | CTCF   | H3F3A    | LMO2    | PHF6   | SHANK2  | TLX1    |         |
| BCORL1    | CTNNB1 | HDAC2    | MED12   | PIK3CA | SI      | TLX3    |         |
| BCR       | DDX3X  | HIST1H3B | MGA     | PIK3R1 | SIRPA   | TOX     |         |
| BPIFB1    | DGCR8  | ID3      | MLLT10  | PTCH1  | SIX1    | TP53    |         |
| BRAF      | DNM2   | IDH1     | MYB     | PTCHD4 | SMARCA4 | UBA2    |         |
| BTG1      | DROSHA | IKZF1    | MYC     | PTEN   | SMARCB1 | USP7    |         |
| C10orf112 | EBF1   | IL7R     | MYCN    | PTPN11 | SMG8    | USP9X   |         |
| CARD11    | EED    | JAK1     | NF1     | PTPN2  | SMO     | WAC     |         |



**Table S5: Genes with >5 probes filtered by pediatric cancer driving genes.** Copy number (CN) results for the 14 highlighted genes were used to optimize the definition of CN loss (<1.1) and CN gain (>3.5). Genes validated by the manufacturer to detect copy number gain indicated by an asterisk.

| <b>OCCRA</b>  |                |               | <b>OCAV3</b>   |                |              |
|---------------|----------------|---------------|----------------|----------------|--------------|
| ABL1          | ACVR1          | ALK*          | ALK*           | <b>ARID1A</b>  | BRAF*        |
| <b>ARID1A</b> | ASXL2          | BRAF*         | CCND3*         | <b>CDK4*</b>   | CDKN1B       |
| CBL           | <b>CDK4*</b>   | <b>CDKN2A</b> | <b>CDKN2A*</b> | <b>CDKN2B*</b> | EP300        |
| <b>CDKN2B</b> | CEBPA          | CREBBP        | FBXW7          | <b>FGFR1*</b>  | FLT3*        |
| CTNNB1        | EBF1           | EED           | <b>KIT*</b>    | <b>KRAS*</b>   | <b>MYC*</b>  |
| <b>FGFR1*</b> | GATA2          | IKZF1         | <b>MYCN*</b>   | NF1            | NOTCH1       |
| JAK1*         | JAK2*          | JAK3*         | NOTCH2         | <b>PDGFRA*</b> | PIK3CA*      |
| <b>KIT*</b>   | KMT2D          | <b>KRAS*</b>  | PIK3R1         | PTCH1          | <b>PTEN</b>  |
| <b>MYC*</b>   | <b>MYCN*</b>   | NF1           | <b>RB1</b>     | ROS1           | <b>SETD2</b> |
| PAX5          | <b>PDGFRA*</b> | PIK3CA        | SLX4           | SMARCA4        | SMARCB1      |
| PIK3R1*       | PTCH1          | <b>PTEN</b>   | SMO            | TERT           | <b>TP53</b>  |
| <b>RB1</b>    | RUNX1          | <b>SETD2</b>  | WHSC1          |                |              |
| SMARCA4       | SMARCB1        | SUFU          |                |                |              |
| SUZ12         | TCF3           | TET2          |                |                |              |
| <b>TP53</b>   | USP7           | WHSC1         |                |                |              |
| WT1           |                |               |                |                |              |

**Table S6: Target and agent pairs identified for each patient sample.**

| Sample | Patient     | OCCRA                                                                       |                                                              | OCAV3                                                                       |                                                              | WGS                                                                              |                                                           |
|--------|-------------|-----------------------------------------------------------------------------|--------------------------------------------------------------|-----------------------------------------------------------------------------|--------------------------------------------------------------|----------------------------------------------------------------------------------|-----------------------------------------------------------|
|        |             | Target                                                                      | Agent                                                        | Target                                                                      | Agent                                                        | Target                                                                           | Agent                                                     |
| 1      | 1           | 0                                                                           | N/A                                                          | 0                                                                           | N/A                                                          | N/A                                                                              | N/A                                                       |
| 2      | 2           | 0                                                                           | N/A                                                          | 0                                                                           | N/A                                                          | N/A                                                                              | N/A                                                       |
| 3      | 3-Diagnosis | 0                                                                           | 0                                                            | 0                                                                           | 0                                                            | N/A                                                                              | N/A                                                       |
| 4      | 3-Relapse2  | CDKN2A loss <sup>[10]</sup>                                                 | CDK4/6 inhibitors ‡                                          | CDKN2A loss <sup>[10]</sup>                                                 | CDK4/6 inhibitors ‡                                          | N/A                                                                              | N/A                                                       |
| 5      | 4-Relapse2  | JAK1 <sup>[11]</sup><br>CDKN2A/B loss <sup>[10]</sup>                       | JAK/STAT inhibitors <sup>^</sup><br>CDK4/6 inhibitors ‡      | JAK1 <sup>[11]</sup><br>CDKN2A/B loss <sup>[10]</sup>                       | JAK/STAT inhibitors <sup>^</sup><br>CDK4/6 inhibitors ‡      | N/A                                                                              | N/A                                                       |
| 6      | 4-Relapse5  | JAK1 <sup>[11]</sup><br>CDKN2A/B loss <sup>[10]</sup>                       | JAK/STAT inhibitors <sup>^</sup><br>CDK4/6 inhibitors ‡      | JAK1 <sup>[11]</sup><br>CDKN2A/B loss <sup>[10]</sup>                       | JAK/STAT inhibitors <sup>^</sup><br>CDK4/6 inhibitors ‡      | N/A                                                                              | N/A                                                       |
| 7      | 5           | KRAS <sup>[12]</sup><br>CDKN2A/B loss <sup>[10]</sup>                       | MEK inhibitors *<br>CDK4/6 inhibitors ‡                      | KRAS <sup>[12]</sup><br>CDKN2A/B loss <sup>[10]</sup>                       | MEK inhibitors *<br>CDK4/6 inhibitors ‡                      | N/A                                                                              | N/A                                                       |
| 8      | 6-Relapse1  | JAK2 amp <sup>[11]</sup>                                                    | JAK/STAT inhibitors <sup>^</sup>                             | 0                                                                           | N/A                                                          | N/A                                                                              | N/A                                                       |
| 9      | 7           | 0                                                                           | N/A                                                          | 0                                                                           | N/A                                                          | N/A                                                                              | N/A                                                       |
| 10     | 8           | CDKN2A/B loss <sup>[10]</sup>                                               | CDK4/6 inhibitors ‡                                          | CDKN2A/B loss <sup>[10]</sup>                                               | CDK4/6 inhibitors ‡                                          | N/A                                                                              | N/A                                                       |
| 11     | 9           | 0                                                                           | N/A                                                          | 0                                                                           | N/A                                                          | N/A                                                                              | N/A                                                       |
| 12     | 10          | CDKN2A loss <sup>[10]</sup>                                                 | CDK4/6 inhibitors ‡                                          | CDKN2A loss <sup>[10]</sup>                                                 | CDK4/6 inhibitors ‡                                          | N/A                                                                              | N/A                                                       |
| 13     | 11          | CDKN2A/B loss <sup>[10]</sup><br>NUP214-ABL1 <sup>[13]</sup>                | CDK4/6 inhibitors ‡<br>Tyrosine Kinase inh <sup>^</sup>      | 0                                                                           | N/A                                                          | N/A                                                                              | N/A                                                       |
| 14     | 12          | CDKN2A/B loss <sup>[10]</sup>                                               | CDK4/6 inhibitors ‡                                          | CDKN2A/B loss <sup>[10]</sup>                                               | CDK4/6 inhibitors ‡                                          | N/A                                                                              | N/A                                                       |
| 15     | 13          | 0                                                                           | N/A                                                          | 0                                                                           | N/A                                                          | N/A                                                                              | N/A                                                       |
| 16     | 14          | 0                                                                           | N/A                                                          | 0                                                                           | N/A                                                          | N/A                                                                              | N/A                                                       |
| 17     | 15          | 0                                                                           | N/A                                                          | MYCN amp <sup>[14]</sup>                                                    | BET inhibitors ‡                                             | 0                                                                                | N/A                                                       |
| 18     | 16          | CDKN2A/B loss <sup>[10]</sup>                                               | CDK4/6 inhibitors ‡                                          | 0                                                                           | N/A                                                          | 0                                                                                | N/A                                                       |
| 19     | 17-Relapse5 | BRAF <sup>[15]</sup>                                                        | BRAF inhibitors *                                            | BRAF <sup>[15]</sup>                                                        | BRAF inhibitors *                                            | BRAF <sup>[15]</sup>                                                             | BRAF inhibitors *                                         |
| 20     | 18-Relapse1 | KRAS amp <sup>[12]</sup>                                                    | MEK inhibitors *                                             | KRAS amp <sup>[12]</sup>                                                    | MEK inhibitors *                                             | KRAS amp <sup>[12]</sup><br>HRAS amp <sup>[16]</sup>                             | MEK inhibitors *                                          |
| 21     | 19          | TSC2 <sup>[17]</sup><br>CDK4 amp <sup>[18]</sup><br>MYC amp <sup>[19]</sup> | MTOR inhibitors *<br>CDK4/6 inhibitors ‡<br>BET inhibitors ‡ | TSC2 <sup>[17]</sup><br>CDK4 amp <sup>[18]</sup><br>MYC amp <sup>[19]</sup> | MTOR inhibitors *<br>CDK4/6 inhibitors ‡<br>BET inhibitors ‡ | CDK4 amp <sup>[18]</sup><br>MYC amp <sup>[19]</sup>                              | CDK4/6 inhibitors ‡<br>BET inhibitors ‡                   |
| 22     | 20          | FGFR1 amp <sup>[20]</sup>                                                   | FGFR inhibitors *                                            | FGFR1 amp <sup>[20]</sup>                                                   | FGFR inhibitors *                                            | 0                                                                                | N/A                                                       |
| 23     | 21          | CDKN2A/B loss <sup>[10]</sup>                                               | CDK4/6 inhibitors ‡                                          | 0                                                                           | N/A                                                          | CDKN2A/B loss <sup>[10]</sup>                                                    | CDK4/6 inhibitors ‡                                       |
| 24     | 22-Relapse1 | NF1 <sup>[21]</sup><br>FGFR1 amp <sup>[20]</sup><br>MYC amp <sup>[19]</sup> | MEK inhibitors *<br>FGFR inhibitors *<br>BET inhibitors ‡    | NF1 <sup>[21]</sup><br>FGFR1 amp <sup>[20]</sup><br>MYC amp <sup>[19]</sup> | MEK inhibitors *<br>FGFR inhibitors *<br>BET inhibitors ‡    | NF1 loss <sup>[21]</sup><br>FGFR1 amp <sup>[20]</sup><br>MYC amp <sup>[19]</sup> | MEK inhibitors *<br>FGFR inhibitors *<br>BET inhibitors ‡ |
| 25     | 23          | 0                                                                           | N/A                                                          | 0                                                                           | N/A                                                          | 0                                                                                | N/A                                                       |
| 26     | 24-Relapse1 | NF1 <sup>[21]</sup>                                                         | MEK inhibitors*                                              | NF1 <sup>[21]</sup>                                                         | MEK inhibitors*                                              | NF1 loss <sup>[21]</sup>                                                         | MEK inhibitors*                                           |
| 27     | 25          | CDKN2A/B loss <sup>[10]</sup>                                               | CDK4/6 inhibitors ‡                                          | PDGFRA amp <sup>[22]</sup>                                                  | PDGFRA inhibitors*                                           | PDGFRA amp <sup>[22]</sup>                                                       | PDGFRA inhibitors*                                        |
| 28     | 26          | 0                                                                           | N/A                                                          | 0                                                                           | N/A                                                          |                                                                                  |                                                           |

\* agents reviewed by the target-agent prioritization (TAP) committee and included in Pediatric MATCH trial

‡ agents that were reviewed by the TAP committee for Pediatric MATCH and are not included in the trial

^ agents that were supported by clinical trials or case reports.

## References for Supplementary Materials

1. Lih, C.J., Harrington, R.D., Sims, D.J., Harper, K.N., Bouk, C.H., Datta, V., Yau, J., Singh, R.R., Routbort, M.J., Luthra, R., et al. (2017). Analytical Validation of the Next-Generation Sequencing Assay for a Nationwide Signal-Finding Clinical Trial: Molecular Analysis for Therapy Choice Clinical Trial. *The Journal of molecular diagnostics : JMD* 19, 313-327.
2. Hiemenz, M.C., Ostrow, D.G., Busse, T.M., Buckley, J., Maglinte, D.T., Bootwalla, M., Done, J., Ji, J., Raca, G., Ryutov, A., et al. (2018). OncoKids: A Comprehensive Next-Generation Sequencing Panel for Pediatric Malignancies. *The Journal of molecular diagnostics : JMD*.
3. Laskin, J., Jones, S., Aparicio, S., Chia, S., Ch'ng, C., Deyell, R., Eirew, P., Fok, A., Gelmon, K., Ho, C., et al. (2015). Lessons learned from the application of whole-genome analysis to the treatment of patients with advanced cancers. *Cold Spring Harbor molecular case studies* 1, a000570.
4. Allen, C.E., Laetsch, T.W., Mody, R., Irwin, M.S., Lim, M.S., Adamson, P.C., Seibel, N.L., Parsons, D.W., Cho, Y.J., Janeway, K., et al. (2017). Target and Agent Prioritization for the Children's Oncology Group-National Cancer Institute Pediatric MATCH Trial. *Journal of the National Cancer Institute* 109.
5. Furumoto, Y., and Gadina, M. (2013). The arrival of JAK inhibitors: advancing the treatment of immune and hematologic disorders. *BioDrugs : clinical immunotherapeutics, biopharmaceuticals and gene therapy* 27, 431-438.
6. Deenik, W., Beverloo, H.B., van der Poel-van de Luytgarde, S.C., Wattel, M.M., van Esser, J.W., Valk, P.J., and Cornelissen, J.J. (2009). Rapid complete cytogenetic remission after upfront dasatinib monotherapy in a patient with a NUP214-ABL1-positive T-cell acute lymphoblastic leukemia. *Leukemia* 23, 627-629.
7. Clarke, S., O'Reilly, J., Romeo, G., and Cooney, J. (2011). NUP214-ABL1 positive T-cell acute lymphoblastic leukemia patient shows an initial favorable response to imatinib therapy post relapse. *Leukemia research* 35, e131-133.
8. Grobner, S.N., Worst, B.C., Weischenfeldt, J., Buchhalter, I., Kleinheinz, K., Rudneva, V.A., Johann, P.D., Balasubramanian, G.P., Segura-Wang, M., Brabetz, S., et al. (2018). The landscape of genomic alterations across childhood cancers. *Nature* 555, 321-327.
9. Ma, X., Liu, Y., Liu, Y., Alexandrov, L.B., Edmonson, M.N., Gawad, C., Zhou, X., Li, Y., Rusch, M.C., Easton, J., et al. (2018). Pan-cancer genome and transcriptome analyses of 1,699 paediatric leukaemias and solid tumours. *Nature* 555, 371-376.
10. Shapiro, G.I. (2017). Genomic Biomarkers Predicting Response to Selective CDK4/6 Inhibition: Progress in an Elusive Search. *Cancer cell* 32, 721-723.

11. O'Shea, J.J., Schwartz, D.M., Villarino, A.V., Gadina, M., McInnes, I.B., and Laurence, A. (2015). The JAK-STAT pathway: impact on human disease and therapeutic intervention. *Annual review of medicine* 66, 311-328.
12. Janne, P.A., Shaw, A.T., Pereira, J.R., Jeannin, G., Vansteenkiste, J., Barrios, C., Franke, F.A., Grinsted, L., Zazulina, V., Smith, P., et al. (2013). Selumetinib plus docetaxel for KRAS-mutant advanced non-small-cell lung cancer: a randomised, multicentre, placebo-controlled, phase 2 study. *The Lancet. Oncology* 14, 38-47.
13. Quintas-Cardama, A., Tong, W., Manshour, T., Vega, F., Lennon, P.A., Cools, J., Gilliland, D.G., Lee, F., Cortes, J., Kantarjian, H., et al. (2008). Activity of tyrosine kinase inhibitors against human NUP214-ABL1-positive T cell malignancies. *Leukemia* 22, 1117-1124.
14. Puissant, A., Frumm, S.M., Alexe, G., Bassil, C.F., Qi, J., Chanthery, Y.H., Nekritz, E.A., Zeid, R., Gustafson, W.C., Greninger, P., et al. (2013). Targeting MYCN in neuroblastoma by BET bromodomain inhibition. *Cancer discovery* 3, 308-323.
15. Pratilas, C.A., Xing, F., and Solit, D.B. (2012). Targeting oncogenic BRAF in human cancer. *Current topics in microbiology and immunology* 355, 83-98.
16. Kiessling, M.K., Curioni-Fontecedro, A., Samaras, P., Atrott, K., Cosin-Roger, J., Lang, S., Scharl, M., and Rogler, G. (2015). Mutant HRAS as novel target for MEK and mTOR inhibitors. *Oncotarget* 6, 42183-42196.
17. Franz, D.N., Belousova, E., Sparagana, S., Bebin, E.M., Frost, M., Kuperman, R., Witt, O., Kehrman, M.H., Flamini, J.R., Wu, J.Y., et al. (2013). Efficacy and safety of everolimus for subependymal giant cell astrocytomas associated with tuberous sclerosis complex (EXIST-1): a multicentre, randomised, placebo-controlled phase 3 trial. *Lancet* 381, 125-132.
18. Rader, J., Russell, M.R., Hart, L.S., Nakazawa, M.S., Belcastro, L.T., Martinez, D., Li, Y., Carpenter, E.L., Attiyeh, E.F., Diskin, S.J., et al. (2013). Dual CDK4/CDK6 inhibition induces cell-cycle arrest and senescence in neuroblastoma. *Clinical cancer research : an official journal of the American Association for Cancer Research* 19, 6173-6182.
19. Bandopadhyay, P., Bergthold, G., Nguyen, B., Schubert, S., Gholamin, S., Tang, Y., Bolin, S., Schumacher, S.E., Zeid, R., Masoud, S., et al. (2014). BET bromodomain inhibition of MYC-amplified medulloblastoma. *Clinical cancer research : an official journal of the American Association for Cancer Research* 20, 912-925.
20. Andre, F., Bachelot, T., Campone, M., Dalenc, F., Perez-Garcia, J.M., Hurvitz, S.A., Turner, N., Rugo, H., Smith, J.W., Deudon, S., et al. (2013). Targeting FGFR with dovitinib (TKI258): preclinical and clinical data in breast cancer. *Clinical cancer research : an official journal of the American Association for Cancer Research* 19, 3693-3702.

21. See, W.L., Tan, I.L., Mukherjee, J., Nicolaides, T., and Pieper, R.O. (2012). Sensitivity of glioblastomas to clinically available MEK inhibitors is defined by neurofibromin 1 deficiency. *Cancer research* 72, 3350-3359.
22. Dai, X., Theobard, R., Cheng, H., Xing, M., and Zhang, J. (2018). Fusion genes: A promising tool combating against cancer. *Biochimica et biophysica acta. Reviews on cancer* 1869, 149-160.
